# Supplementary material for: Molecular Lipopolysaccharide Di-Vaccine Protects from Shiga-Toxin Producing Epidemic Strains of Escherichia coli O157:H7 and O104:H4
Source: MDPI journal article supplement (doi:10.3390/vaccines10111854), 2022-11-01
Supplement: s1 [file s1]

## Supplement

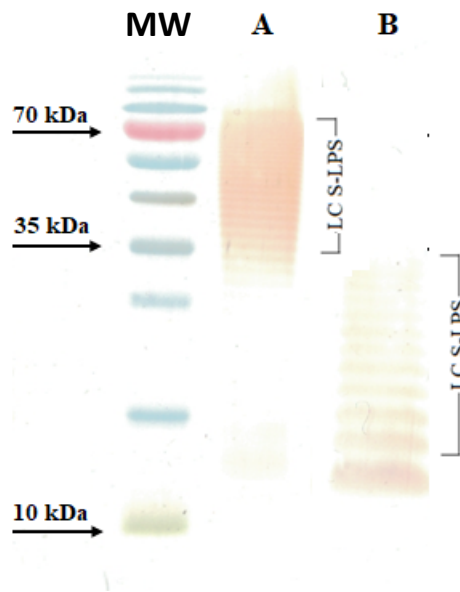

**Figure S1.** Uncropped image of silver-stained SDS-12% polyacrylamide gel electrophoresis of S-LPS from *E. coli* O157 (A) with molecular weight of 35-70 kDa and *E. coli* O104 (B) with molecular weight of 15-35 kDa. LC S-LPS indicate S-LPS with long-chain O-polysaccharide. MW – molecular mass standard. Due to the size difference sample (B) is running out of the gel before bands in sample (A) get fully resolved.

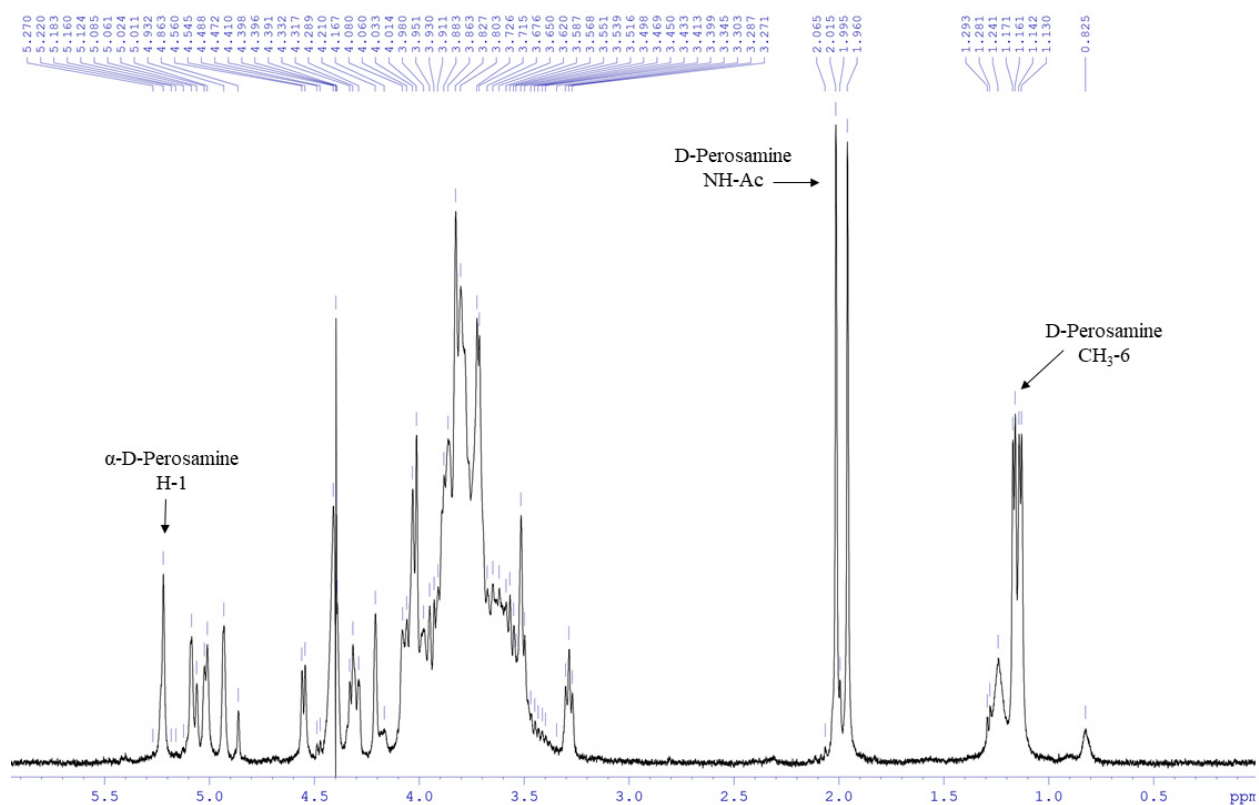

**Figure S2.**  $^1\text{H}$ -NMR spectrum (500MHz, 50°C) of the O-chain of the 3-O-Acyl-LPS from *E. coli* O157. The chemical shift assignments for  $\alpha$ -D-Perosamine ( $\alpha$ -D-PerNac) were made by the comparison with literature data [1].

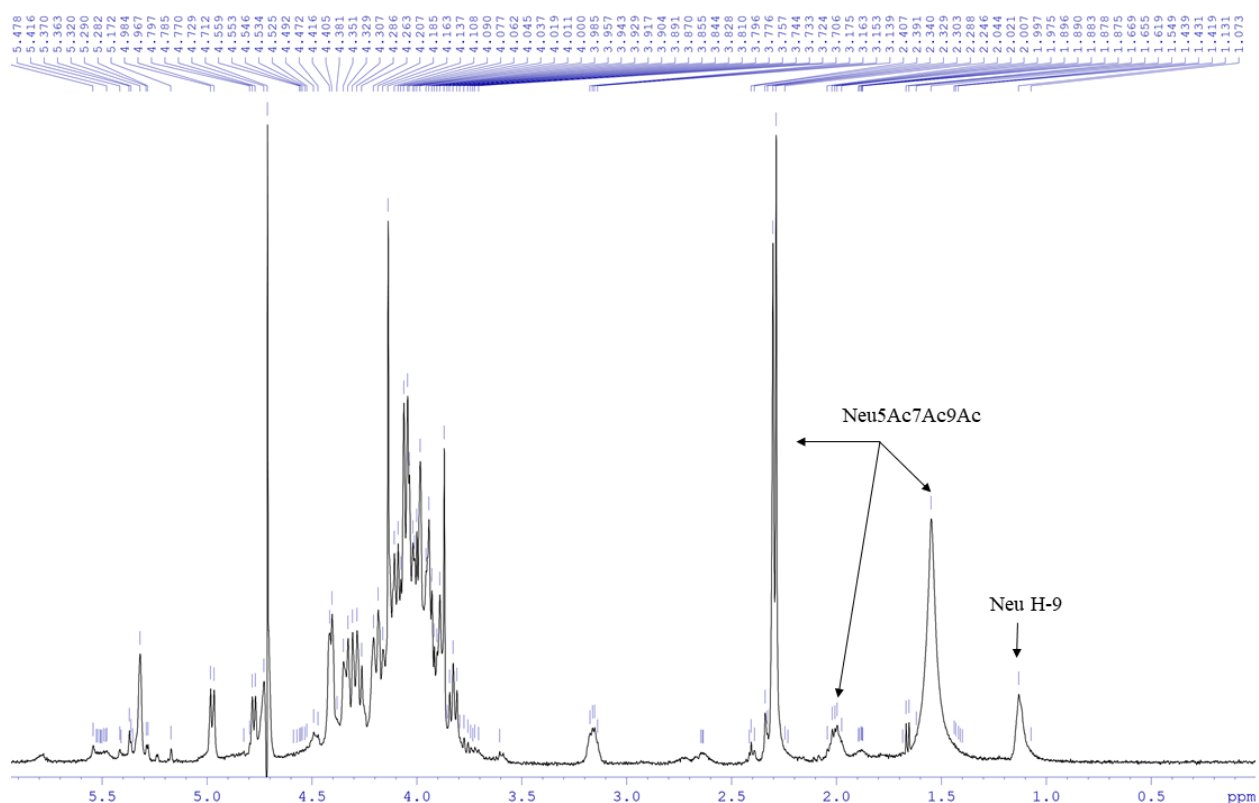

**Figure S3.** <sup>1</sup>H-NMR spectrum (500MHz, 50°C) of the O-chain of the 3-O-Acyl-LPS from *E. coli* O104. The chemical shift assignments for N-acetyl-7,9-di-O-acetylneuraminic acid ( $\alpha$ -Neu5Ac7Ac9Ac) were made by the comparison with literature data [2].

#### Supplemental references

- [1] Perry, M.B. "Structure of the O-chain polysaccharide of the phenol-phase soluble lipopolysaccharide of *Escherichia coli* 0:157:H7". *Biochemistry and Cell Biology*. **1986**, 64(1), 21-28
- [2] Gamian, A. "The structure of the sialic acid-containing *Escherichia coli* O104 O-specific polysaccharide and its linkage to the core region in lipopolysaccharide". *Carbohydrate Research*. **1992**, 236, 195-208
